# Supplementary material for: A Short Measure of Childbearing Motivations: Development and Psychometric Evaluation in Polish Samples of Adults and Adolescents
Source: Springer Nature journal article supplement (doi:10.1007/s10826-022-02497-6), 2022-12-01
Supplement: MOESM1 [file 23781446]

Electronic Supplementary Material 1. Content of all items included into the CBQ-SF.

Table 1

*Content of items in the CBQ -SF with factor loadings (in relation to respective subscales) as identified in Study 1 (S1) and Study 2 (S2), see also: Figures 2-5 in the manuscript*

| Subscale | Item code | Item content | Factor loadings (final solution) | |
| --- | --- | --- | --- | --- |
| *PCM: Positive childbearing motivations* | | | *S1* | *S2* |
| JoysPBI | P7 | Breastfeeding a baby / Bottle feeding a baby | 0.81 | 0.75 |
| P11 | Holding and cuddling a baby | 0.96 | 0.92 |
| P3 | Feeling a baby move and kick inside me / Feeling a baby move and kick inside my wife | 0.85 | 0.82 |
| InstVoC | P1 | Knowing that I am fertile | 0.79 | 0.67 |
| P2 | Having my family and friends admire me with my baby | 0.70 | 0.64 |
| P35 | *Having a child will make me feel a grown-up and responsible person1 | 0.80 | 0.74 |
| FeelNaC | P18 | Having my child provide me with companionship later in life | 0.79 | 0.62 |
| P25 | Living a fuller, more enriched life through my child | 0.93 | 0.86 |
| P6 | Feeling needed and useful through my child | 0.87 | 0.80 |
| SatChR | P21 | Playing with my child | 0.93 | 0.87 |
| P23 | Guiding and teaching my child | 0.87 | 0.78 |
| P30 | *Watching my child grow and develop | 0.95 | 0.95 |
| TradPar | P14 | Having a child who will carry on my family **traditions** | 0.86 | 0.66 |
| P15 | Being the center of a large, active family | 0.86 | 0.74 |
| P16 | Strengthening our marriage / relationship through a child | 0.87 | 0.88 |
| *NCM: Negative Childbearing Motivations* | | |  |  |
| DiscPaC | N1 | Experiencing the discomforts of pregnancy / Seeing my wife experience the discomforts of pregnancy | 0.67 | 0.63 |
| N20 | Experiencing the pain of childbirth / Seeing my wife experience the pain of childbirth | 0.70 | 0.62 |
| N22 | *Constantly lacking sleep with an infant2 | 0.86 | 0.76 |
| ParStr | N3 | Staining our marriage/ relationship with a baby | 0.63 | 0.59 |
| N13 | Having a child who is a burden to my husband / Having a child who is a burden to my wife | 0.76 | 0.69 |
| N28 | *Having a child will result in me having less time for my husband/ partner / Having a child will result in my wife/partner having less time for me | 0.78 | 0.74 |
| NegChC | N2 | Being kept from my career or job by a baby / Having my wife being kept from her career or job by a baby | 0.62 | 0.58 |
| N5 | Being responsible for a needy and demanding baby3 | 0.82 | 0.78 |
| N8 | Having to put up with the mess and noise that children make | 0.83 | 0.74 |
| FaWPar | N10 | Worrying about the health and safety of my child | 0.64 | 0.59 |
| N15 | Worrying whether I am raising my child the right way | 0.75 | 0.65 |
| N19 | Feeling guilty or inadequate as a parent4 | 0.67 | 0.61 |

Note: Where applicable, female and male versions of the item are provided.

Instruction: We are interested in what there is about having children that is desirable to you and what there is that is undesirable to you. Regardless of whether you are a partner or not, whether you plan to have children or not, you will have feelings about what is good and what is bad about having children. This questionnaire is designed to help us understand those feelings. It has two parts. One asks about the desirable consequences of having children and the other one – about the undesirable consequences.

For PCM: How desirable for you are the following consequences? Very – Moderately – Slightly – Not at all

For NCM: How undesirable for you are the following consequences? Very – Moderately – Slightly – Not at all

In four subscales, alternative items were tested at the second step of the research procedure (cf. section *Procedure and Measures*). The choice between the alternative items was made based on the psychometric characteristics (item-total correlation, factor loadings and the consistency of the respective subscale).

**1**An alternative item tested: *Having a child will constitute a family.

**2**An alternative item tested: *My body will be less attractive after I give birth./ My wife’s body will be less attractive after she gives birth.
Note: The selected item showed higher correlation with the original two items of the subscale. Moreover, its content aligns with the core definition of the scale, as it refers to a negative physical (not esthetical) consequence of having a baby. However, the item is not directly linked to pregnancy and delivery. In future studies we suggest to verify a new alternative item for this subscale: Having a pregnancy that interferes with my health. / Seeing a pregnancy interferes with my wife’s health.

**3** An alternative item tested: Spending time and energy involved in childcare.

**4** An alternative item tested: Having an unhappy and poorly adjusted child.

* Items marked with an asterisk were added in the Polish adaptation of the CBQ (Mynarska & Rytel, 2014).
