# Supplementary material for: A Short Measure of Childbearing Motivations: Development and Psychometric Evaluation in Polish Samples of Adults and Adolescents
Source: Springer Nature journal article supplement (doi:10.1007/s10826-022-02497-6), 2022-12-01
Supplement: MOESM2 [file 23781446]

Electronic Supplementary Material 2a. Skewness, kurtosis, and means (standard deviations) for all variables in Study 1.

Table 1

*Characteristics of the PCM Items and Subscales in Study 1*

| Variable | Skewness | Kurtosis | M (*SD*) |
| --- | --- | --- | --- |
| P7 | -0.37 | -1.11 | 2.73 (*1.07*) |
| P11 | -1.35 | 0.66 | 3.36 (*0.95*) |
| P3 | -0.87 | -0.59 | 3.10 (*1.07*) |
| JoysPBI | -0.94 | -0.16 | 3.06 (*0.90*) |
| P14 | -0.43 | -1.00 | 2.78 (*1.05*) |
| P15 | -0.28 | -1.06 | 2.63 (*1.03*) |
| P16 | -0.47 | -1.17 | 2.84 (*1.12*) |
| TradPar | -0.45 | -0.9 | 2.75 (*0.94*) |
| P21 | -1.27 | 0.59 | 3.32 (*0.94*) |
| P23 | -1.33 | 0.74 | 3.35 (*0.92*) |
| P30 | -1.47 | 1.00 | 3.40 (*0.94*) |
| SatChR | -1.51 | 1.34 | 3.36 (*0.86*) |
| P18 | -0.54 | -0.93 | 2.88 (*1.05*) |
| P25 | -1.05 | -0.05 | 3.21 (*0.99*) |
| P6 | -0.90 | -0.41 | 3.14 (*1.02*) |
| FeelNaC | -0.91 | -0.13 | 3.08 (*0.89*) |
| P1 | -0.28 | -1.24 | 2.65 (*1.10*) |
| P2 | -0.19 | -1.22 | 2.59 (*1.07*) |
| P35 | -0.10 | -1.37 | 2.52 (*1.13*) |
| InstVoC | -0.21 | -0.98 | 2.58 (*0.90*) |

Table 2

*Characteristics of the NCM Items and Subscales in Study 1.*

| Variable | Skewness | Kurtosis | M (*SD*) |
| --- | --- | --- | --- |
| N1 | -0.45 | -0.97 | 2.87 (*1.02*) |
| N20 | -0.5 | -1.04 | 2.90 (*1.07*) |
| N22 | 0.22 | -1.13 | 2.36 (*1.05*) |
| DiscPaC | -0.25 | -0.78 | 2.71 (*0.83*) |
| N10 | -0.18 | -1.25 | 2.63 (*1.09*) |
| N15 | -0.04 | -1.13 | 2.53 (*1.03*) |
| N19 | 0.08 | -1.36 | 2.58 (*1.12*) |
| FaWPar | -0.06 | -0.75 | 2.55 (*0.82*) |
| N2 | 0.23 | -1.06 | 2.31(*1.02*) |
| N5 | 0.14 | -1.19 | 2.35 (*1.05*) |
| N8 | 0.39 | -0.96 | 2.23 (*1.02*) |
| NegChC | 0.29 | -0.76 | 2.29 (*0.84*) |
| N3 | 0.80 | -0.81 | 1.92 (*1.11*) |
| N13 | 0.34 | -1.12 | 2.24 (*1.06*) |
| N28 | 0.26 | -0.93 | 2.29 (*0.98*) |
| ParStr | 0.41 | -0.7 | 2.15 (*0.83)* |

Table 3

*Characteristics of the Desire and Intention scales in Study 1.*

| Variable | Skewness | Kurtosis | M (*SD*) |
| --- | --- | --- | --- |
| DES1 | -1.07 | 0 | 7.32 (*3.12*) |
| DES2 | -1.04 | -0.04 | 7.15 (*3.18*) |
| DES3 | -1.17 | .20 | 7.36 (*3.20*) |
| Desire | -1.11 | 0.2 | 7.28 (*3.01*) |
| INT1 | -0.51 | -1.13 | 6.10 (*3.63*) |
| INT2 | -0.23 | -1.31 | 5.40 (*3.58*) |
| Intention | -0.38 | -1.17 | 5.75 (*3.45*) |
