# Supplementary material for: A Short Measure of Childbearing Motivations: Development and Psychometric Evaluation in Polish Samples of Adults and Adolescents
Source: Springer Nature journal article supplement (doi:10.1007/s10826-022-02497-6), 2022-12-01
Supplement: MOESM3 [file 23781446]

Electronic Supplementary Material 2b. Skewness, kurtosis, and means (standard deviations) for all variables in Study 2.

Table 1

*Characteristics of the PCM Items and Subscales in Study 2.*

| Variable | Skewness | Kurtosis | M (*SD*) |
| --- | --- | --- | --- |
| P7 | -0.32 | -0.98 | 2.67 (*1.01)* |
| P11 | -1.53 | 1.52 | 3.46 (*0.84)* |
| P3 | -0.83 | -0.58 | 3.08 (*1.05)* |
| JoysPBI | -0.93 | 0.13 | 3.05 (*0.74)* |
| P14 | -0.53 | -0.74 | 2.90 (*0.98)* |
| P15 | -0.42 | -0.68 | 2.79 (*0.94)* |
| P16 | -0.88 | -0.33 | 3.15 (*0.97)* |
| TradPar | -0.57 | -0.43 | 2.80 (*0.74)* |
| P21 | -1.46 | 1.34 | 3.47 (*0.81)* |
| P23 | -1.65 | 2.33 | 3.53 (*0.75)* |
| P30 | -1.99 | 3.28 | 3.59 (*0.77)* |
| SatChR | -1.83 | 3.69 | 3.46 (*0.60)* |
| P18 | -0.66 | -0.48 | 3.05 (*0.92)* |
| P25 | -1.01 | 0.14 | 3.24 (*0.90)* |
| P6 | -0.98 | -0.18 | 3.19 (*0.98)* |
| FeelNaC | -1.10 | 0.64 | 3.18 (*0.72)* |
| P1 | -0.32 | -1.12 | 2.72 (*1.06)* |
| P2 | -0.08 | -1.16 | 2.57 (*1.04*) |
| P35 | -0.47 | -0.98 | 2.86 (*1.04)* |
| InstVoC | -0.58 | -0.13 | 2.88 (*0.72)* |

Table 2

*Characteristics of the NCM Items and Subscales in Study 2.*

| Variable | Skewness | Kurtosis | M (*SD*) |
| --- | --- | --- | --- |
| N1 | -0.64 | -0.78 | 3.03 (*1.00)* |
| N20 | -0.75 | -0.72 | 3.09 (*1.03)* |
| N22 | 0.12 | -1.13 | 2.45 *(1.03)* |
| DiscPaC | -0.62 | -0.58 | 3.06 (*0.87)* |
| N10 | -0.07 | -1.56 | 2.54 (*1.22*) |
| N15 | -0.21 | -1.14 | 2.68 (*1.04*) |
| N19 | -0.61 | -1.14 | 2.98 (*1.14*) |
| FaWPar | -0.48 | -0.40 | 2.85 (*0.71)* |
| N2 | -0.09 | -0.95 | 2.57 (*0.96*) |
| N5 | 0.23 | -1.14 | 2.30 (*1.04*) |
| N8 | 0.32 | -1.10 | 2.29 (*1.05*) |
| NegChC | 0.29 | -0.68 | 2.34 (*0.72)* |
| N3 | 0.60 | -1.37 | 2.08 (*1.27*) |
| N13 | 0.01 | -1.38 | 2.49 (*1.13*) |
| N28 | -0.01 | -1.00 | 2.50 (*0.98*) |
| ParStr | 0.17 | -0.90 | 2.32 (*0.82)* |

Table 3

*Characteristics of the Desire and Intention scales in Study 2.*

| Variable | Skewness | Kurtosis | M (*SD*) |
| --- | --- | --- | --- |
| DES1 | -1.07 | 0 | 7.32 (*3.12*) |
| DES2 | -1.04 | -0.04 | 7.15 (*3.18*) |
| DES3 | -1.17 | .20 | 7.36 (*3.20*) |
| Desire | -1.11 | 0.2 | 7.28 (*3.01*) |
| INT1 | -0.51 | -1.13 | 6.10 (*3.63*) |
| INT2 | -0.23 | -1.31 | 5.40 (*3.58*) |
| Intention | -0.38 | -1.17 | 5.75 (*3.45*) |
